# Supplementary material
Source: publisher figshare collection journal article supplement (https://acs.figshare.com/ndownloader/files/4939213)
Supplement: Supplementary file 1 [file 4939213]

Compound	SMILES
1	O=C(N(CC1=C2N=C3C(C=CC=C3)=C1)C2=C4)C5=C4[C@@](O)(CC)C(OC5)=O
2	O=C1C2=C(C=C(OCO3)C3=C2)C4=C1C5=CC(OC)=C(OC)C=C5C(N4CCCN6CCOCC6)=O
3	O=C1C2=C(C=C(OCO3)C3=C2)C4=C1C5=CC(OC)=C(OC)C=C5C(N4CCCN6C=CN=C6)=O
4	O=C1C2=C(C=C(OCO3)C3=C2)C4=C1C5=CC(OC)=C(OC)C=C5C(N4CCCNCCO)=O
5	O=C1C2=C(C=CC=C2)C3=C1C4=CC=CC=C4C(N3CCCNCCCNCCCN5C(C6=CC=CC=C6C7=C5C(C=CC=C8)=C8C7=O)=O)=O
6	O=C(N1)C(C(N2C3=CC=CC(C4=NN=NN4)=C3)=NC1=O)=CC5=C2C=C(C#N)C=C5
7	O=C1OC(C2=CC=CN=C21)=O
8	O=C1C2=CC=CN=C2CO1
9	O=C1C2=CC=CN=C2C(Br)O1
10	O=C1C2=CC=CN=C2C(O)O1
11	O=C(OC1)C2=C1C=CC=C2
12	O=C1C2=C(C=CC=C2)C(C1C3=NC=CC=C3C(O)=O)=O
13	O=C1C2=C(C=CC=C2)C3=C1C4=NC=CC=C4C(O3)=O
14	OC(C1=CC=NC=C1)=O
15	O=C(NC1=CC=CC=C1)C2=CC=NC=C2
16	O=C1C2=CC=NC=C2C(O)N1C3=CC=CC=C3
17	O=C(NC1=CC=CC=C1)C2=CC=NC=C2CO
18	O=C1C2=CC=NC=C2CO1
19	BrC1OC(C2=CC=NC=C21)=O
20	OC1OC(C2=CC=NC=C21)=O
21	O=C1C2=C(C=CC=C2)C3=C1C4=CN=CC=C4C(O3)=O
22	O=C1OC(C2=CN=CC=C21)=O
23	O=C1C2=CN=CC=C2CO1
24	O=C1C2=CN=CC=C2C(Br)O1
25	O=C1C2=CN=CC=C2C(O)O1
26	O=C1C2=C(C=CC=C2)C3=C1C4=CC=NC=C4C(O3)=O
27	O=C(OC)C1=NC=CC=C1C(O)=O
28	O=C1C2=NC=CC=C2CO1
29	O=C1C2=NC=CC=C2C(Br)O1
30	OC1OC(C2=NC=CC=C21)=O
31	O=C1C2=C(C=CC=C2)C3=C1C4=CC=CN=C4C(O3)=O
32	NCCCN1CCOCC1
33	NCCCN1C=CN=C1
34	NCCCN(C)C
35	NC[C@H](O)CO
36	O=C1C2=C(C=CC=C2)C3=C1C4=NC=CC=C4C(N3CCCN5CCOCC5)=O
37	O=C1C2=C(C=CC=C2)C3=C1C4=CN=CC=C4C(N3CCCN5CCOCC5)=O
38	O=C1C2=C(C=CC=C2)C3=C1C4=CC=NC=C4C(N3CCCN5CCOCC5)=O
39	O=C1C2=C(C=CC=C2)C3=C1C4=CC=CN=C4C(N3CCCN5CCOCC5)=O
40	O=C1C2=C(C=CC=C2)C3=C1C4=NC=CC=C4C(N3CCCN5C=CN=C5)=O
41	O=C1C2=C(C=CC=C2)C3=C1C4=CN=CC=C4C(N3CCCN5C=CN=C5)=O
42	O=C1C2=C(C=CC=C2)C3=C1C4=CC=NC=C4C(N3CCCN5C=CN=C5)=O
43	O=C1C2=C(C=CC=C2)C3=C1C4=CC=CN=C4C(N3CCCN5C=CN=C5)=O
44	O=C1C2=C(C=CC=C2)C3=C1C4=NC=CC=C4C(N3CCCN(C)C)=O
45	O=C1C2=C(C=CC=C2)C3=C1C4=CN=CC=C4C(N3CCCN(C)C)=O
46	O=C1C2=C(C=CC=C2)C3=C1C4=CC=NC=C4C(N3CCCN(C)C)=O
47	O=C1C2=C(C=CC=C2)C3=C1C4=CC=CN=C4C(N3CCCN(C)C)=O
48	O=C1C2=C(C=CC=C2)C3=C1C4=NC=CC=C4C(N3C[C@H](O)CO)=O
49	O=C1C2=C(C=CC=C2)C3=C1C4=CN=CC=C4C(N3C[C@H](O)CO)=O
50	O=C1C2=C(C=CC=C2)C3=C1C4=CC=NC=C4C(N3C[C@H](O)CO)=O
51	O=C1C2=C(C=CC=C2)C3=C1C4=CC=CN=C4C(N3C[C@H](O)CO)=O
52	NCCCNC(OC(C)(C)C)=O
53	O=C1C2=C(C=CC=C2)C3=C1C4=NC=CC=C4C(N3CCCNC(OC(C)(C)C)=O)=O
54	O=C1C2=C(C=CC=C2)C3=C1C4=CN=CC=C4C(N3CCCNC(OC(C)(C)C)=O)=O
55	O=C1C2=C(C=CC=C2)C3=C1C4=CC=NC=C4C(N3CCCNC(OC(C)(C)C)=O)=O
56	O=C1C2=C(C=CC=C2)C3=C1C4=CC=CN=C4C(N3CCCNC(OC(C)(C)C)=O)=O
57	O=C1C2=C(C=CC=C2)C3=C1C4=NC=CC=C4C(N3CCCN)=O
58	O=C1C2=C(C=CC=C2)C3=C1C4=CN=CC=C4C(N3CCCN)=O
59	O=C1C2=C(C=CC=C2)C3=C1C4=CC=NC=C4C(N3CCCN)=O
60	O=C1C2=C(C=CC=C2)C3=C1C4=CC=CN=C4C(N3CCCN)=O
61	O=C1C2=C(C=CC=C2)C3=C1C4=CC=CC=C4C(N3CCCN)=O
62	O=C1C2=C(C=CC=C2)C3=C1C4=CC=CC=C4C(N3CCCN5CCOCC5)=O
63	O=C1C2=C(C=CC=C2)C3=C1C4=CC=CC=C4C(N3CCCN5C=CN=C5)=O
64	O=C1C2=C(C=CC=C2)C3=C1C4=CC=CC=C4C(N3CCCN(C)C)=O
65	O=C1C2=C(C=CC=C2)C3=C1C4=CC=CC=C4C(N3C[C@H](O)CO)=O
66	O=C1C2=C(C=CC=C2)C3=C1C4=CC=CC=C4C(N3CCCC(O)=O)=O
